# Supplementary material
Source: HighWire-hosted journal article supplement (https://gut.bmj.com/content/gutjnl-2021-325989)

**A**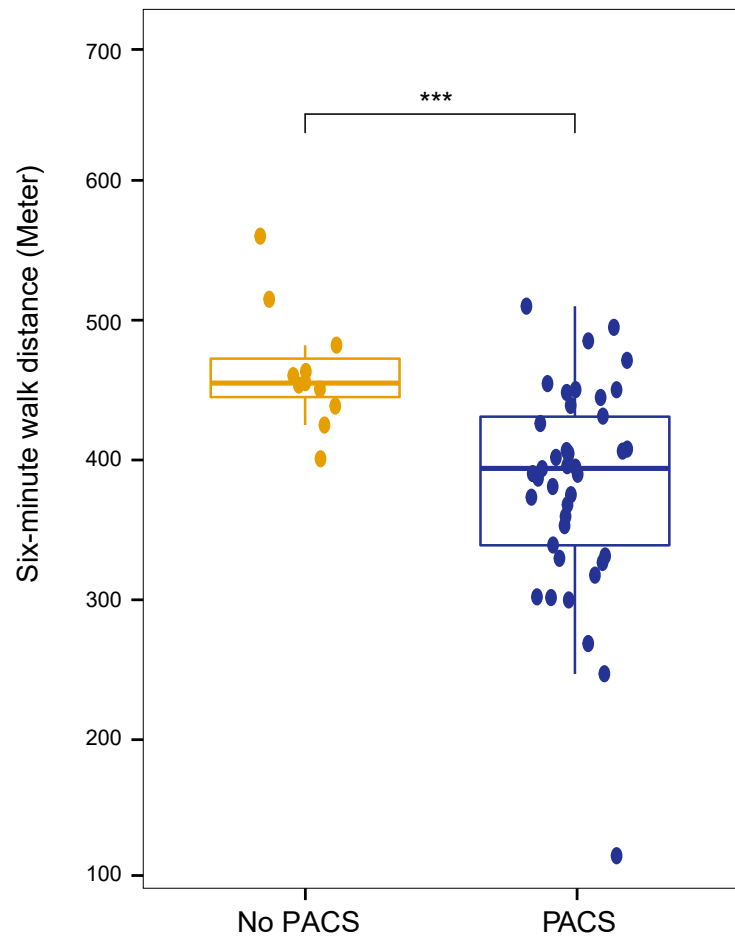**B**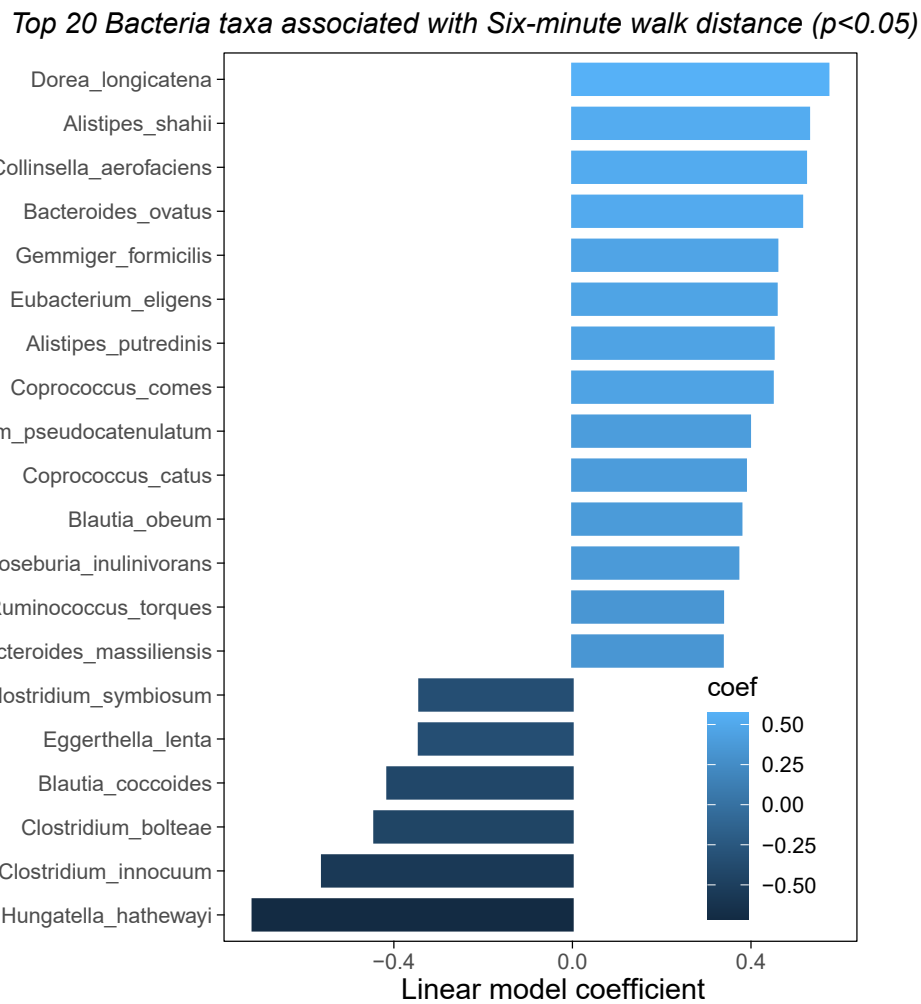

Supplement: inline-supplementary-material-23 [file inline-supplementary-material-23.pdf]
